# Supplementary material for: Organic‐Inorganic Hybrid Hollow Mesoporous Organosilica Nanoparticles for Efficient Ultrasound‐Based Imaging and Controlled Drug Release
Source: Hindawi journal article supplement (doi:10.1155/2014/972475), 2014-01-01
Supplement: f1 [file 972475.f1.docx]

**Organic-Inorganic Hybrid Hollow Mesoporous Organosilica Nanoparticles for Efficient Ultrasound-Based Imaging and Therapy**

Xiaoqin Qian,ab Wenping Wang,a* Wentao Kong,a Yu Chenc*

aThe Department of Ultrasound, Zhongshan Hospitical, Fudan University, Shanghai 200050, P. R. China, Email: [puguang61@126.com](mailto:puguang61@126.com)

bThe First People’s Hospital of Zhenjiang City, Zhengjiang 212002, P. R. China.

cState Key of Laboratory of High Performance Ceramics and Superfine Microstructure, Shanghai Institute of Ceramics, Chinese Academy of Science, Shanghai 200050, P. R. China, Email: [chenyu@mail.sic.ac.cn](mailto:chenyu@mail.sic.ac.cn)

***Figure S1***. *In vitro* ultrasonographic images of PTX-HPMOs of contrast-mode at different concentrations (A-E: 20 mg/ml; F-J:10 mg/ml) and different mechanical indexes (A and F: 0.53; B and G: 0.43; C and H: 0.3; D and I: 0.19;E and J: 0.05)**.**

***Figure S2***.，The effect of the *in vitro* imaging of PTX-HPMOs solutions compare with SonoVue (contrast-mode for simulating human vascular method)**.**


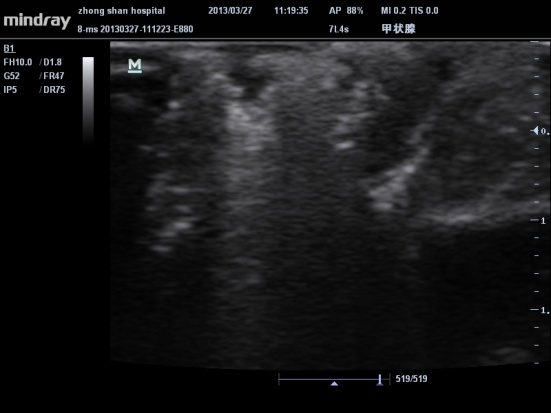


**(a)**


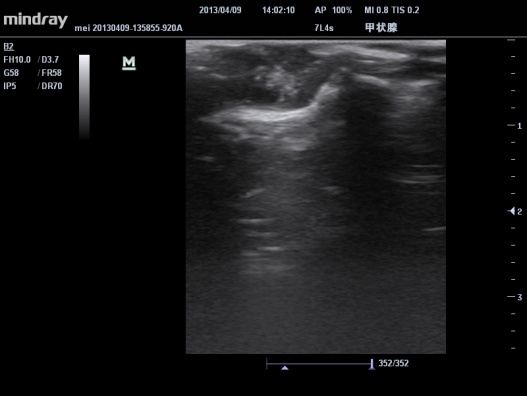


**(b)**

***Figure S3***. *In vivo* tumor ultrasound images of tumor-bearing mice after 30 seconds of administration of PTX-HPMOs (a) and SonoVue (b).
